# Supplementary material for: Distinct methylation levels of mature microRNAs in gastrointestinal cancers
Source: PubMed Central journal article supplement (PMC6715669; doi:10.1038/s41467-019-11826-1), 2019-08-29
Supplement: 41467_2019_11826_MOESM1_ESM.pdf [file 41467_2019_11826_MOESM1_ESM.pdf]

**Distinct Methylation Levels of Mature MicroRNAs in  
Gastrointestinal Cancers**

Konno et al.

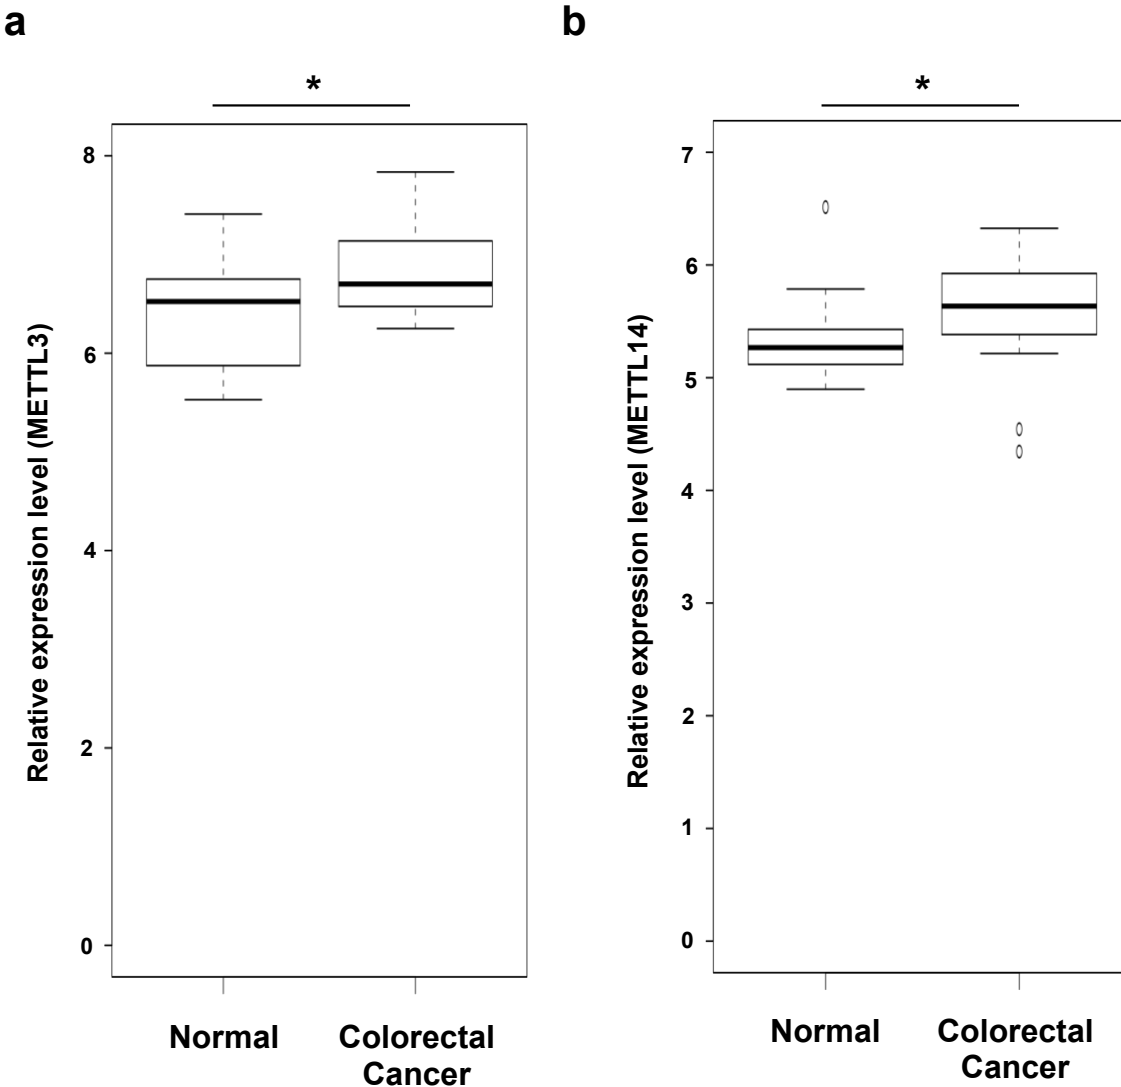

**Supplementary Figure 1.** (a) Analysis of RNA expression levels of the RNA methylase *METTL3* using a Gene Expression Omnibus (GEO) dataset (GDS4382) derived from colorectal cancer and paired normal tissue samples from 17 patients. \*P = 0.06749 (Wilcoxon's t test). (b) Analysis of RNA expression levels of the RNA methylase *METTL14* using a Gene Expression Omnibus (GEO) dataset (GDS4382) derived from colorectal cancer and paired normal tissue samples from 17 patients. \*P = 0.01959 (Wilcoxon's t test). The box range means from the first quartile to the third quartile. The second quartile means the median of the data. The lower limit of the bar was estimated by "the first quartile - 1.5 x interquartile range", and the upper limit of the bar was estimated by "the third quartile + 1.5 x interquartile range".

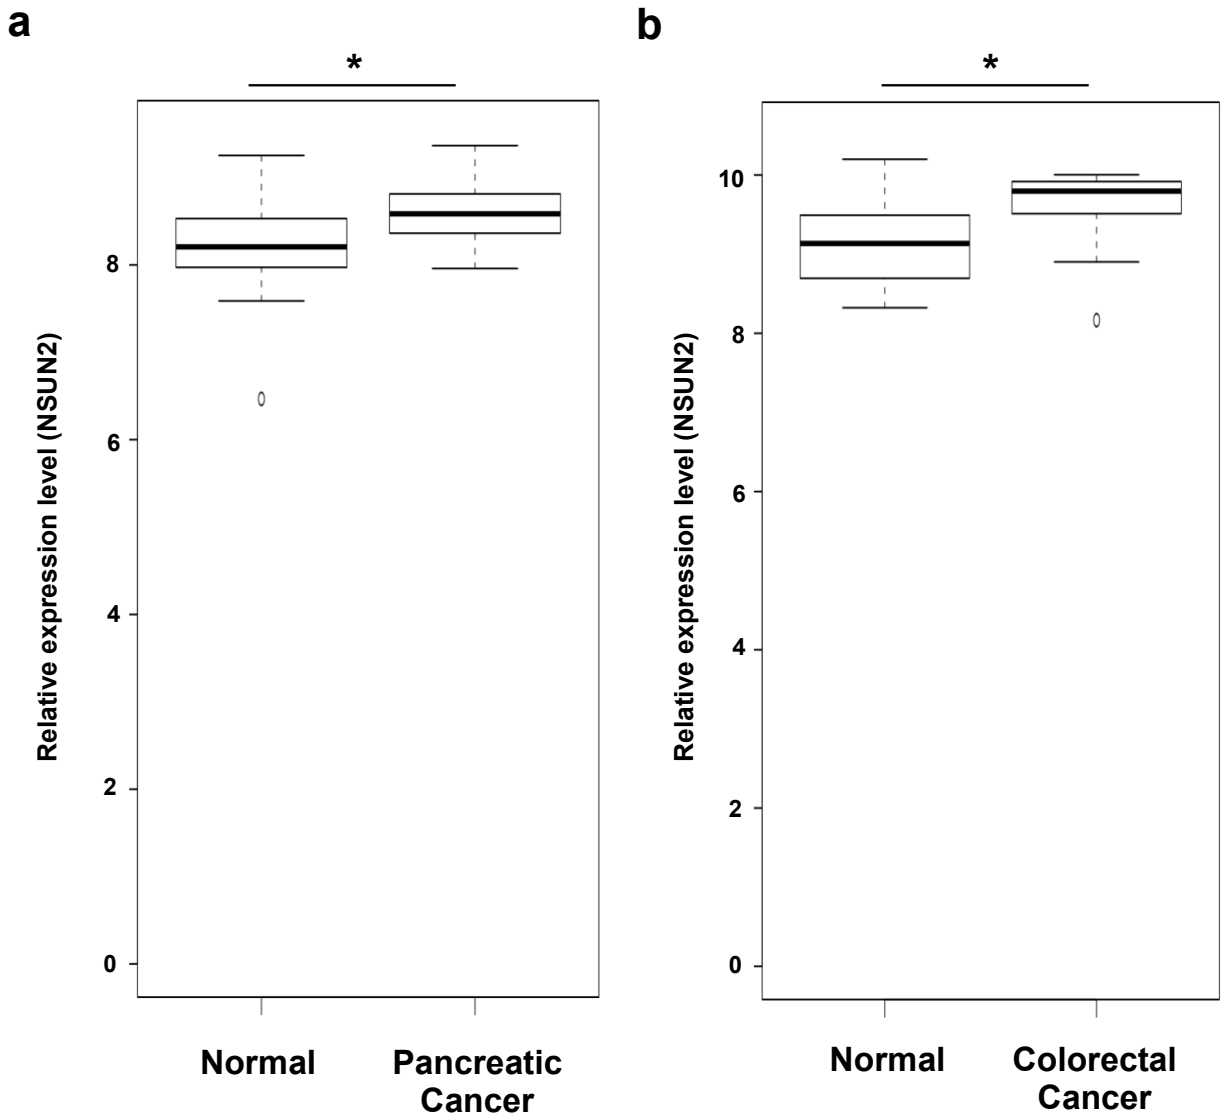

**Supplementary Figure 2.** (a) Analysis of RNA expression levels of the RNA methylase *NSUN2* using a Gene Expression Omnibus (GEO) dataset (GDS4103) derived from pancreatic cancer and paired normal tissue samples from 36 patients. \* $P = 1.474 \times 10^{-5}$  (Wilcoxon's t test). (b) Analysis of RNA expression levels of the RNA methylase *NSUN2* using a Gene Expression Omnibus (GEO) dataset (GDS4382) derived from colorectal cancer and paired normal tissue samples from 17 patients. \* $P = 0.005394$  (Wilcoxon's t test). The box range means from the first quartile to the third quartile. The second quartile means the median of the data. The lower limit of the bar was estimated by "the first quartile - 1.5 x interquartile range", and the upper limit of the bar was estimated by "the third quartile + 1.5 x interquartile range".

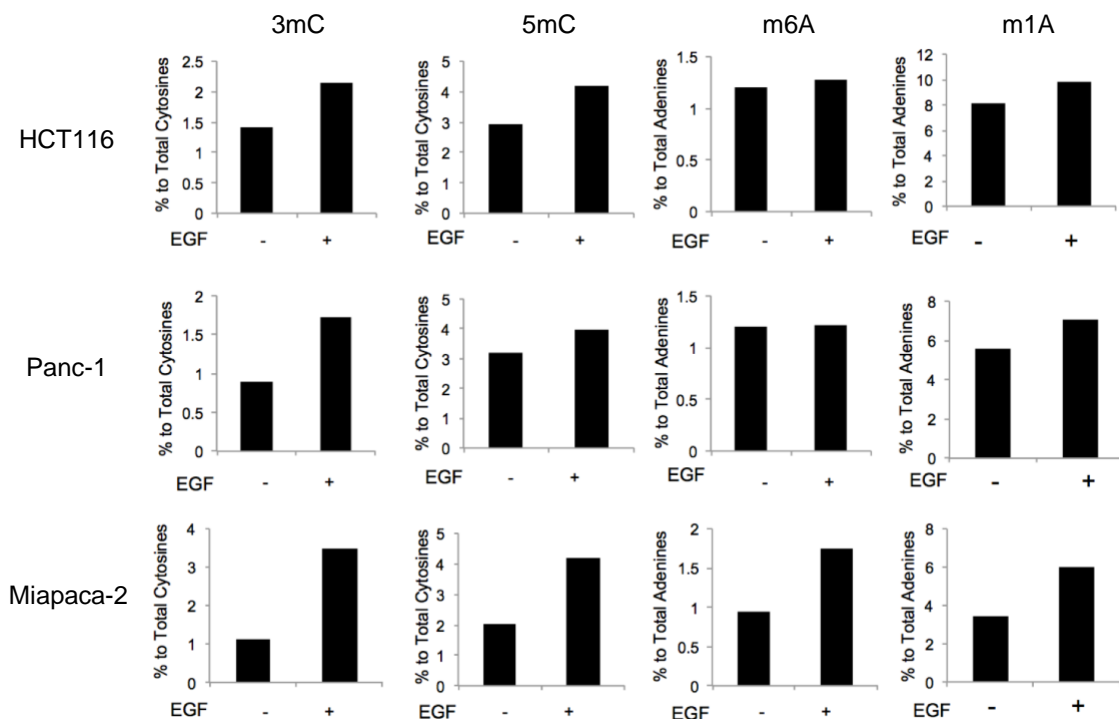

**Supplementary Figure 3.** Abundance ratios of modified oligonucleotides before and after exposure to EGF. Small RNAs were size-fractionated from total RNA by ultrafiltration in the indicated cell lines, and quantified by liquid chromatography–tandem mass spectrometry. Bar graphs show the ratio of modified to total cytosines and adenines. 3mC, 3-methylcytosine; 5mC, 5-methylcytosine; m6A, N6-methyladenine; m1A, 1-methyladenine.

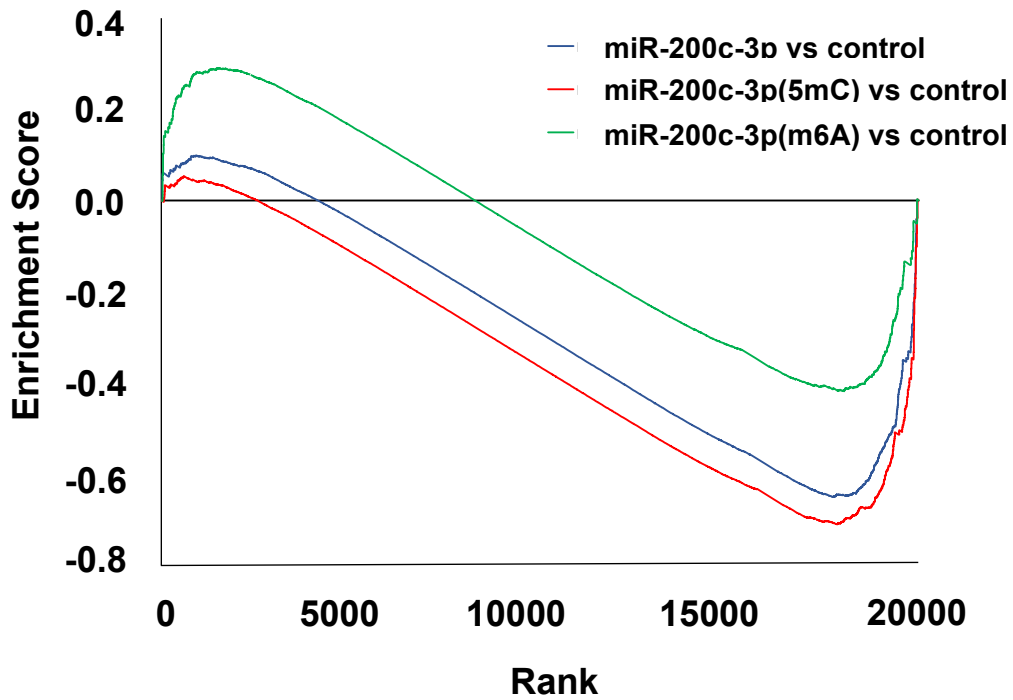

**Supplementary Figure 4.** Differences in gene suppressor effects of non-methylated miR-200c (blue), miR-200c-3p with 5mC (red), and miR-200c-3p with m6A (green), as determined by gene enrichment analyses. Non-methylated and m5C-modified miR-200c-3p showed potent gene-suppressor effects ( $P < 0.005$  and  $0.001$ , respectively; Fisher's exact test), while m6A-modified miR-200c-3p did not suppress target gene expression.

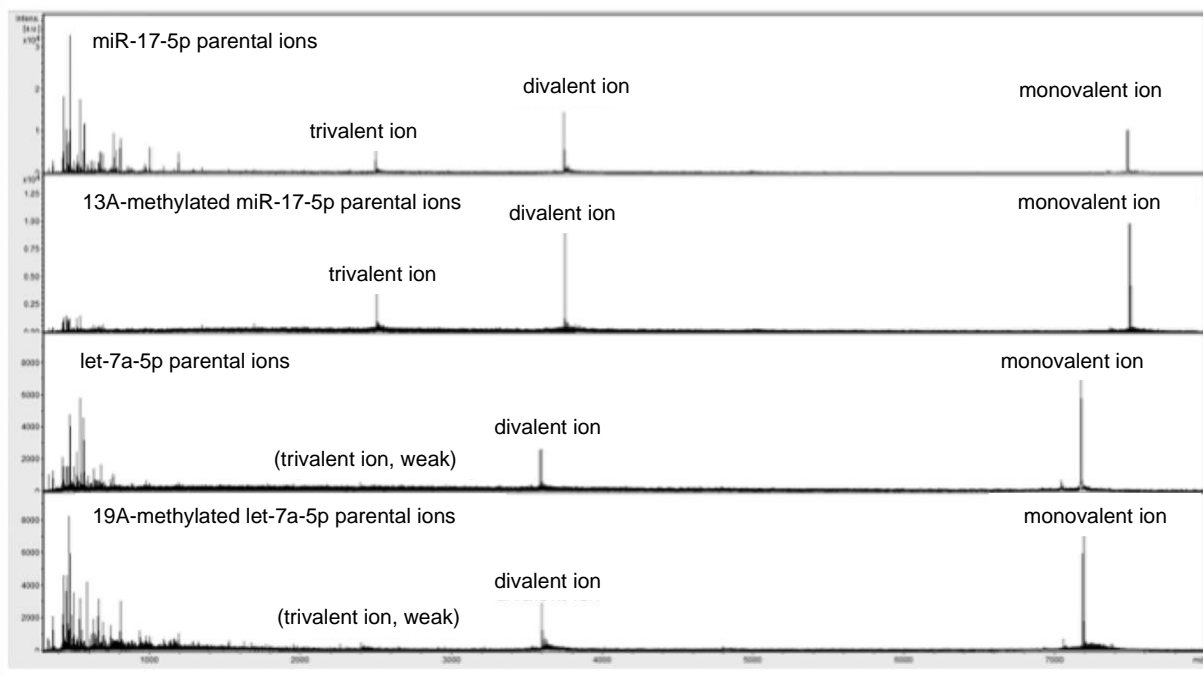

**Supplementary Figure 5.** Mass spectra obtained for synthesized non-methylated miRNAs (miR-17-5p and let-7a-5p) and methylated miRNAs (13A-methylated miR-17-5p and 19A-methylated let-7a-5p) by MALDI-TOF-MS and MALDI-TOF-MS/MS (let-7a-5p). Five pmoles synthesized RNAs were set on target plate. The spectra show monovalent, divalent, and trivalent ions from methylated and non-methylated miRNAs.

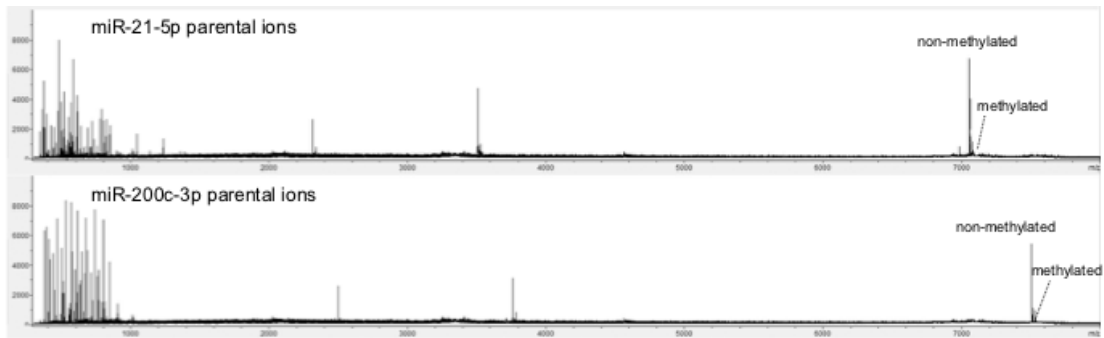

**Supplementary Figure 6.** Mass spectra obtained from patient-derived pancreatic cancer tissue by MALDI-TOF-MS and MALDI-TOF-MS/MS. The spectra show monovalent, divalent, and trivalent ions from non-methylated and methylated miRNAs.

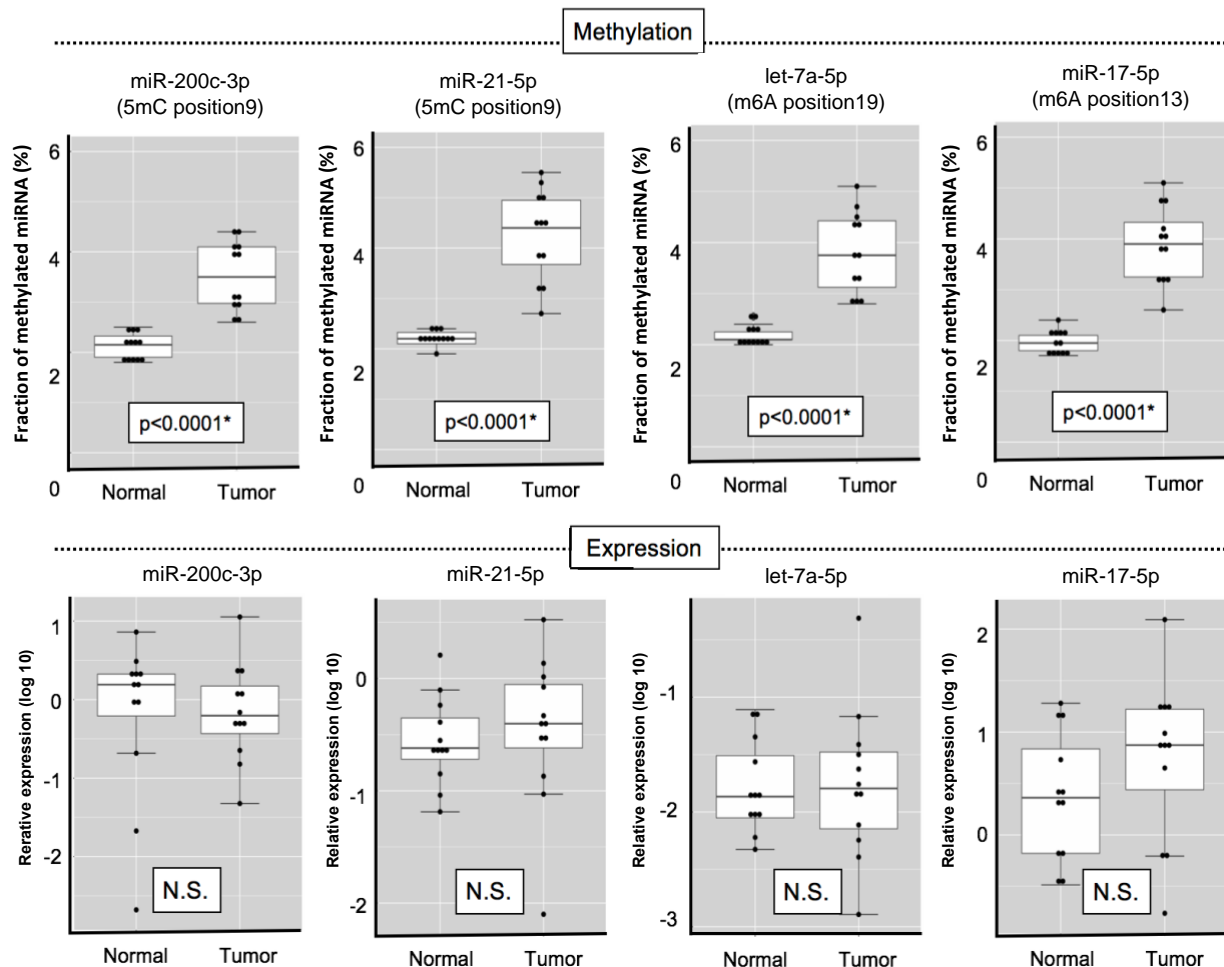

**Supplementary Figure 7.** (Upper panels) Fraction of methylated miRNAs at specific positions in each miRNA in colorectal cancer and paired normal tissues ( $n = 12$ ) (related to Supplementary Figure 8). (Lower panels) Expression level of each miRNA in the same samples determined by qRT-PCR and normalized to that of *RNU48* (internal control). Detailed clinicopathological information on each patient can be found in Supplementary Table S3. \* $P < 0.05$  (t test). The box range means from the first quartile to the third quartile. The second quartile means the median of the data. The lower limit of the bar was estimated by "the first quartile - 1.5 x interquartile range", and the upper limit of the bar was estimated by "the third quartile + 1.5 x interquartile range". Points means individual data value.



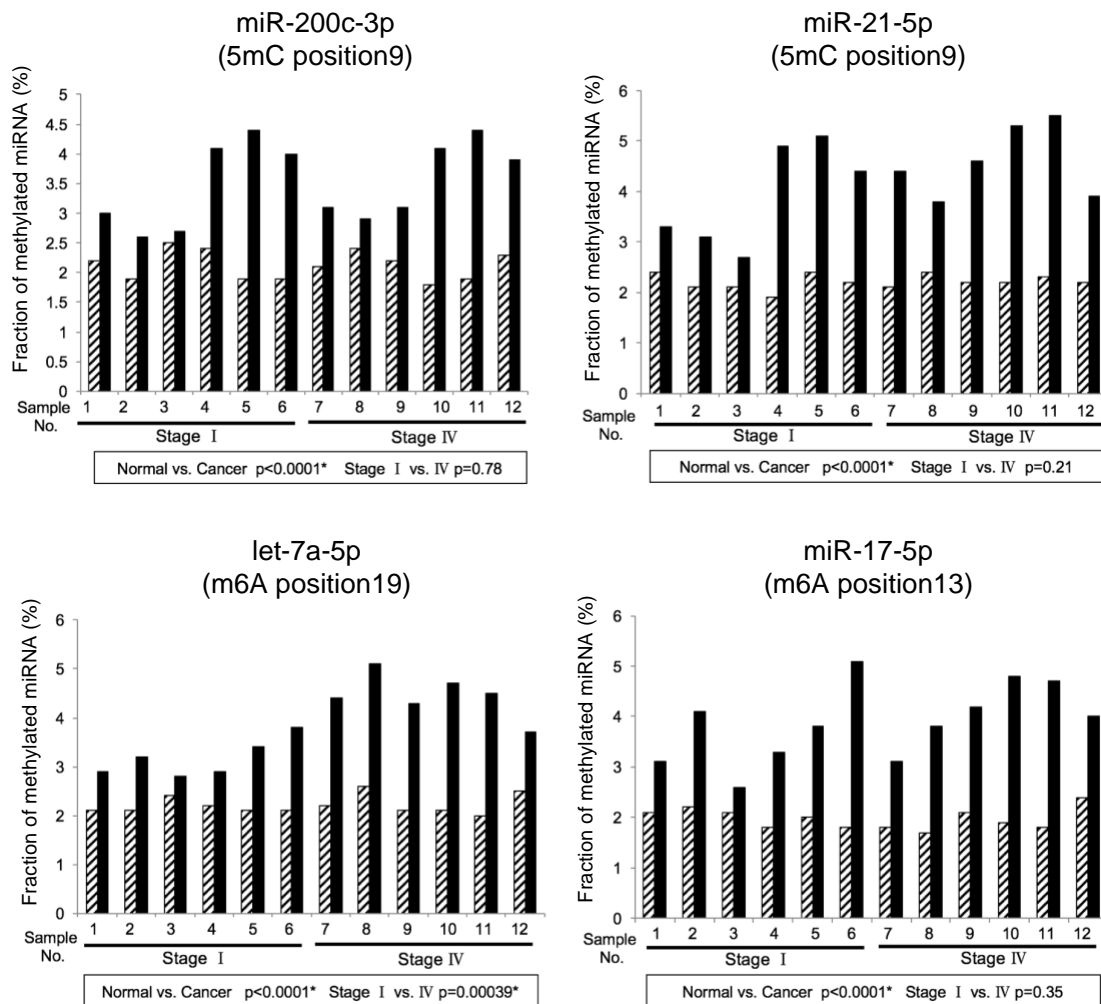

**Supplementary Figure 8.** Fraction of methylated miRNAs at specific positions in each miRNA in colorectal cancer and paired normal tissues. Numbers below the bar graphs indicate different patients. Solid and hatched bars represent cancer and normal tissues, respectively. Samples 1–6 are from stage I and samples 7–12 are from stage IV patients. Detailed clinicopathological information on each patient can be found in Supplementary Table S3. \* $P < 0.05$  (t test).

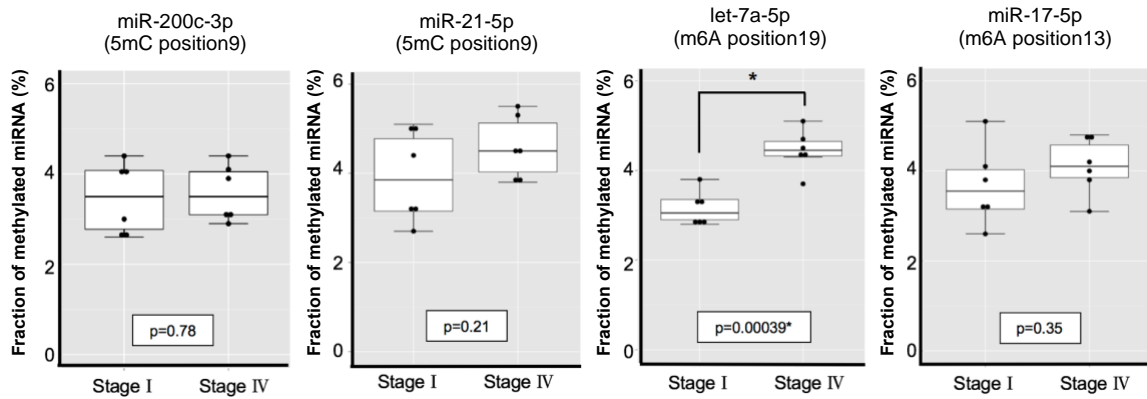

**Supplementary Figure 9.** Comparison of fraction of methylated miRNAs between stages I and IV colorectal cancer tissues. The fraction of methylated miRNAs at specific positions in each miRNA are classified according to pathological stage. \* $P < 0.05$  (t test). The box range means from the first quartile to the third quartile. The second quartile means the median of the data. The lower limit of the bar was estimated by "the first quartile - 1.5 x interquartile range", and the upper limit of the bar was estimated by "the third quartile + 1.5 x interquartile range". Points means individual data value.

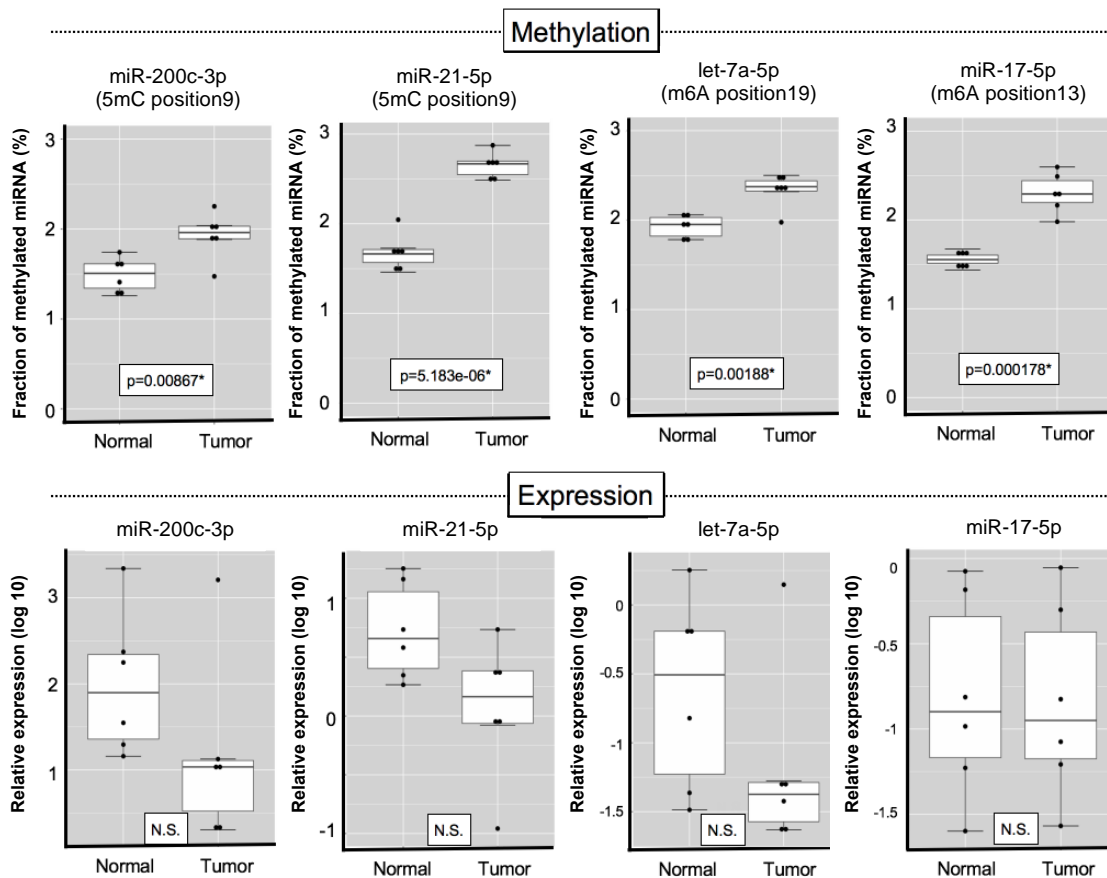

**Supplementary Figure 10.** Increased miRNA methylation levels in gastric cancer tissues. (Upper panels) Fraction of methylated miRNAs at a specific positions in each miRNA in gastric cancer and paired normal tissues (n = 6). (Lower panels) Expression levels of each miRNA in the same samples determined by qRT-PCR. Detailed clinicopathological information on each patient can be found in Supplementary Table S4. \*P < 0.05 (t test). The box range means from the first quartile to the third quartile. The second quartile means the median of the data. The lower limit of the bar was estimated by "the first quartile - 1.5 x interquartile range", and the upper limit of the bar was estimated by "the third quartile + 1.5 x interquartile range". Points means individual data value.

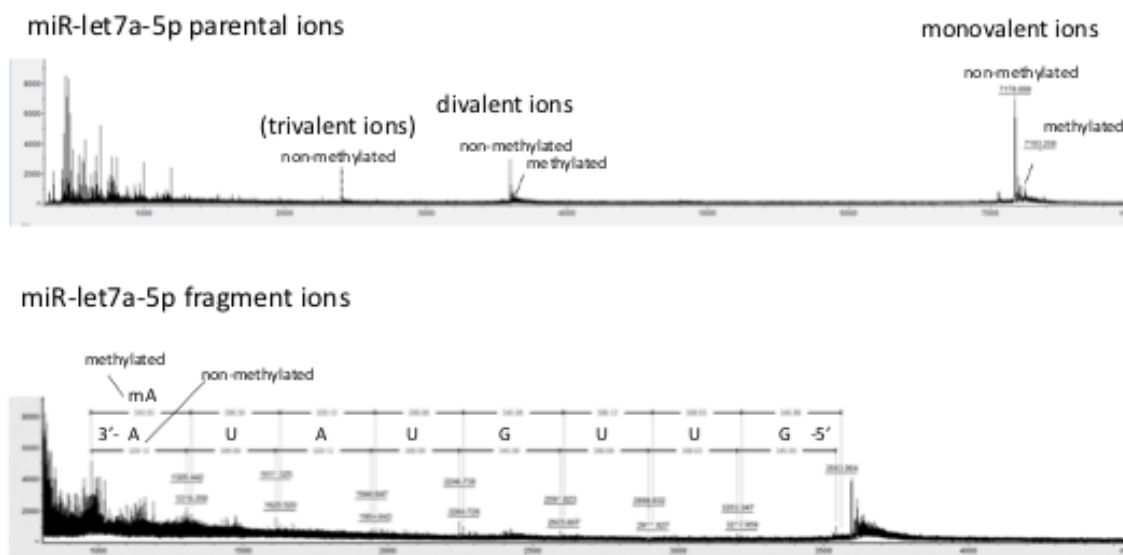

**Supplementary Figure 11.** Mass spectra of patient serum obtained by MALDI-TOF-MS and MALDI-TOF-MS/MS (let-7a-5p). (Upper panels) Spectrum showing monovalent, divalent, and trivalent ions from methylated and non-methylated let-7a-5p. (Lower panels) MS/MS spectrum of let-7a-5p fragment ions from base 12–19. The adenine at position 19 shows an additional peak ( $1319-1305 = +14$  m/z), indicating methylation (see Supplementary Methods for details).

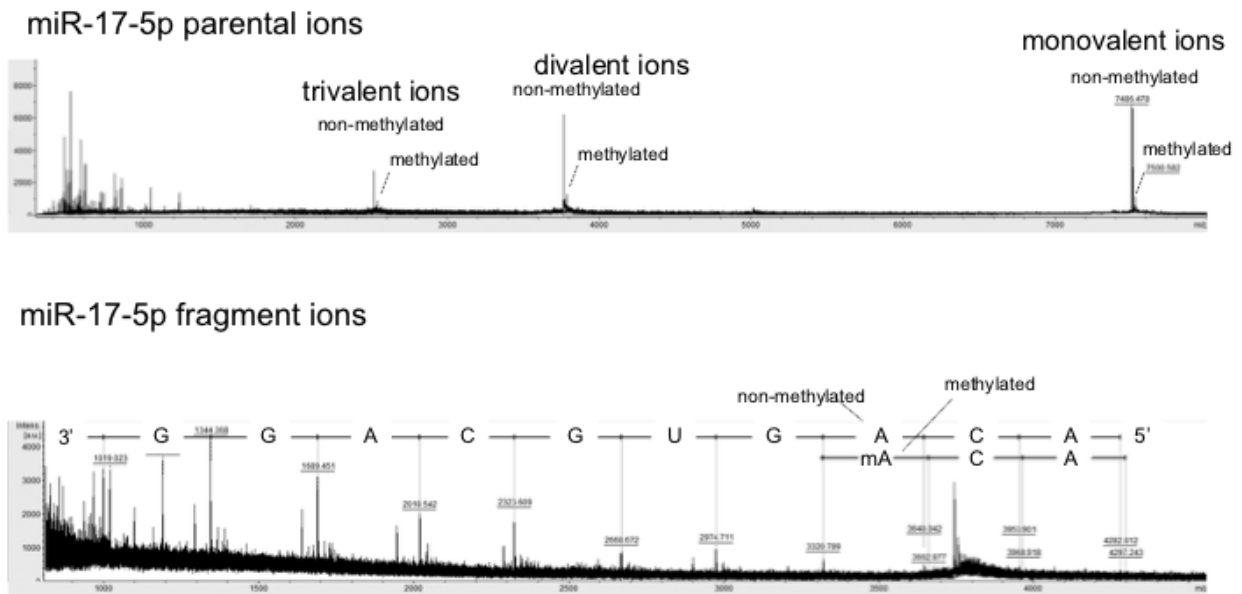

**Supplementary Figure 12.** Mass spectra of patient serum obtained by MALDI-TOF-MS and MALDI-TOF-MS/MS (miR-17-5p). (Upper panels) Spectrum showing monovalent, divalent, and trivalent ions from methylated and non-methylated let-7a-5p. (Lower panels) MS/MS spectrum of miR-17-5p. Fragment ions from base 11–20 are shown. The adenine at position 13 shows an additional peak (3662–3648 = +14 m/z), indicating methylation (see Supplementary Methods for details).

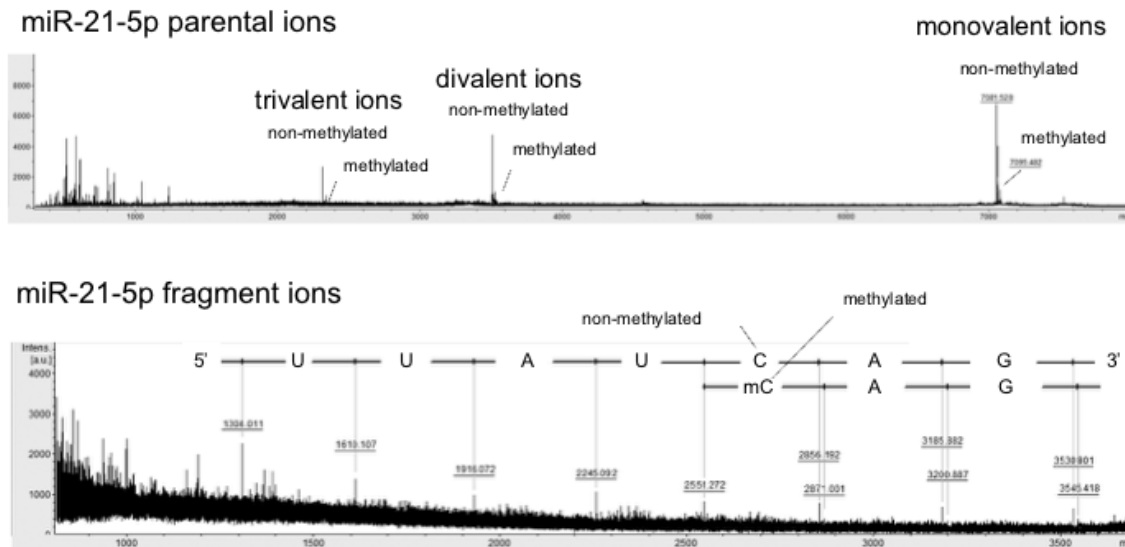

**Supplementary Figure 13.** Mass spectra of patient serum obtained by MALDI-TOF-MS and MALDI-TOF-MS/MS (miR-21-5p). (Upper panels) Spectrum showing monovalent, divalent, and trivalent ions from methylated and non-methylated miR-21-5p. (Lower panels) MS/MS spectrum of miR-21-5p. Fragment ions from base 5–11 are shown. The cytosine at position 9 showed an additional peak (2856–2870 = +14 m/z), indicating methylation (see Supplementary Methods for details).

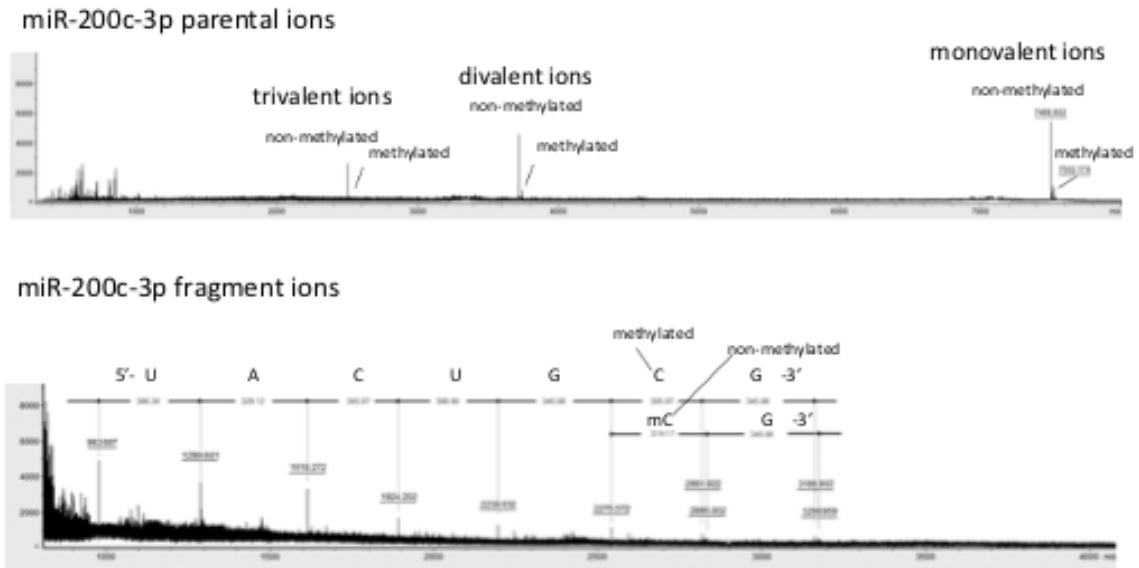

**Supplementary Figure 14.** Mass spectra of pancreatic cancer tissue obtained by MALDI-TOF-MS and MALDI-TOF-MS/MS (miR-200c-3p). (Upper panels) Spectrum showing monovalent, divalent, and trivalent ions from methylated and non-methylated miR-200c-3p. (Lower panels) MS/MS spectrum showing miR-200c-3p fragment ions from base 4–10. The cytosine at position 9 showed an additional peak (2895–2881 = +14 m/z), indicating methylation (see Supplementary Methods for details).

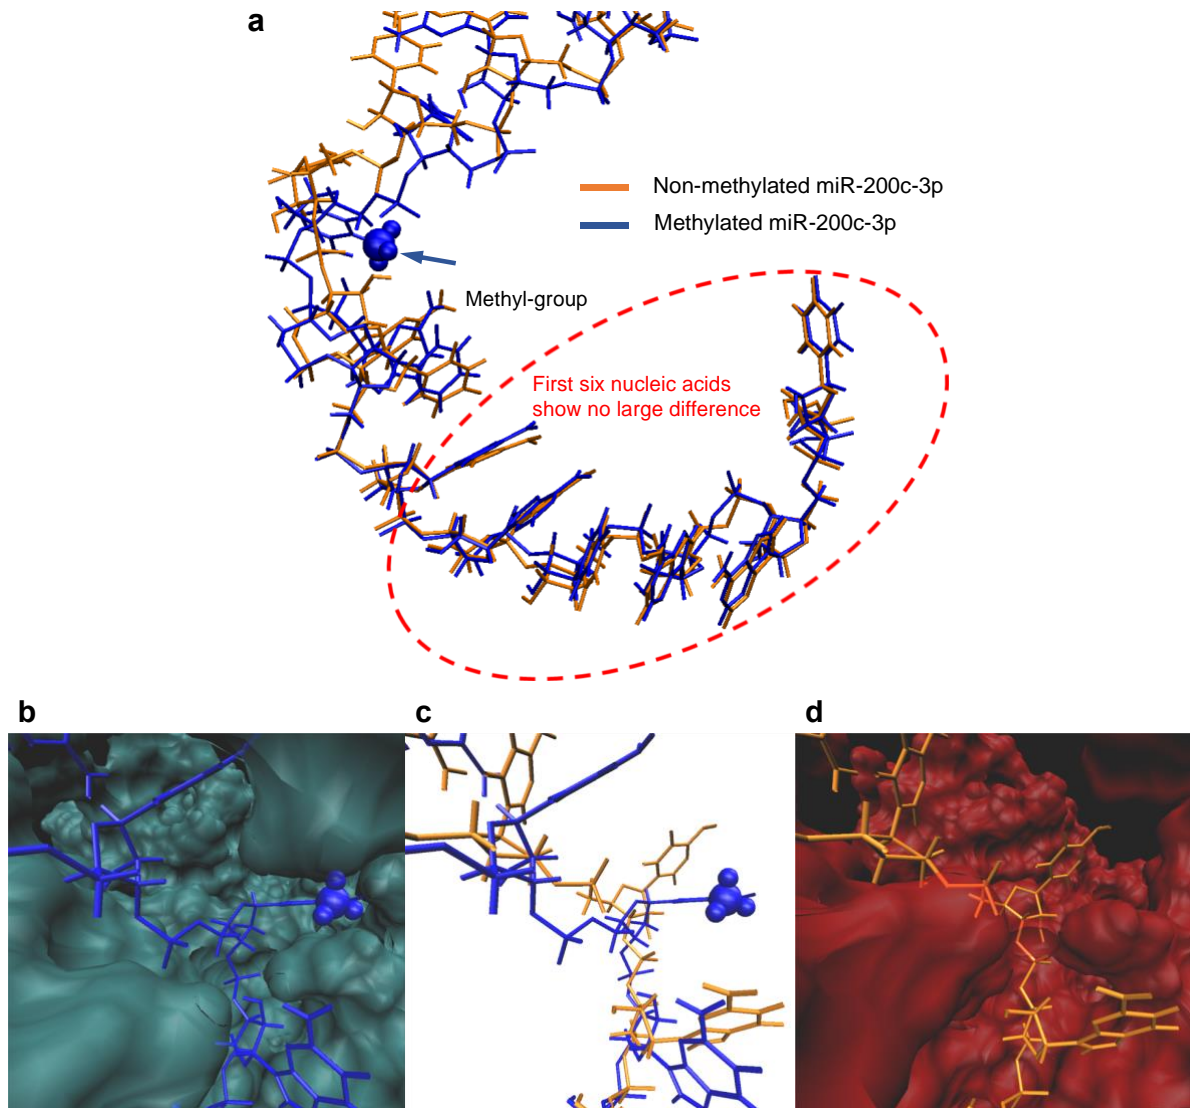

**Supplementary Figure 15.** Prediction of miR-200c-3p binding to AGO2 protein by a molecular mechanics approach. (a) Superposition of each miRNA is shown for stabilized conformations of each complex, as estimated by energy minimization. Orange and blue bonds represent means for miR-200c-3p and for the methylated body, respectively. There was no significant difference in first six bases; however, a change in the binding interaction was observed around the methyl group. (b) Reduced space around the methyl group due to enhanced van der Waals interactions between the methyl group and AGO2 protein. (c) Altered orientation depending on the presence of a methyl group. (d) Complex of non-methylated miR-200c-3p has more free space than the methylated form.



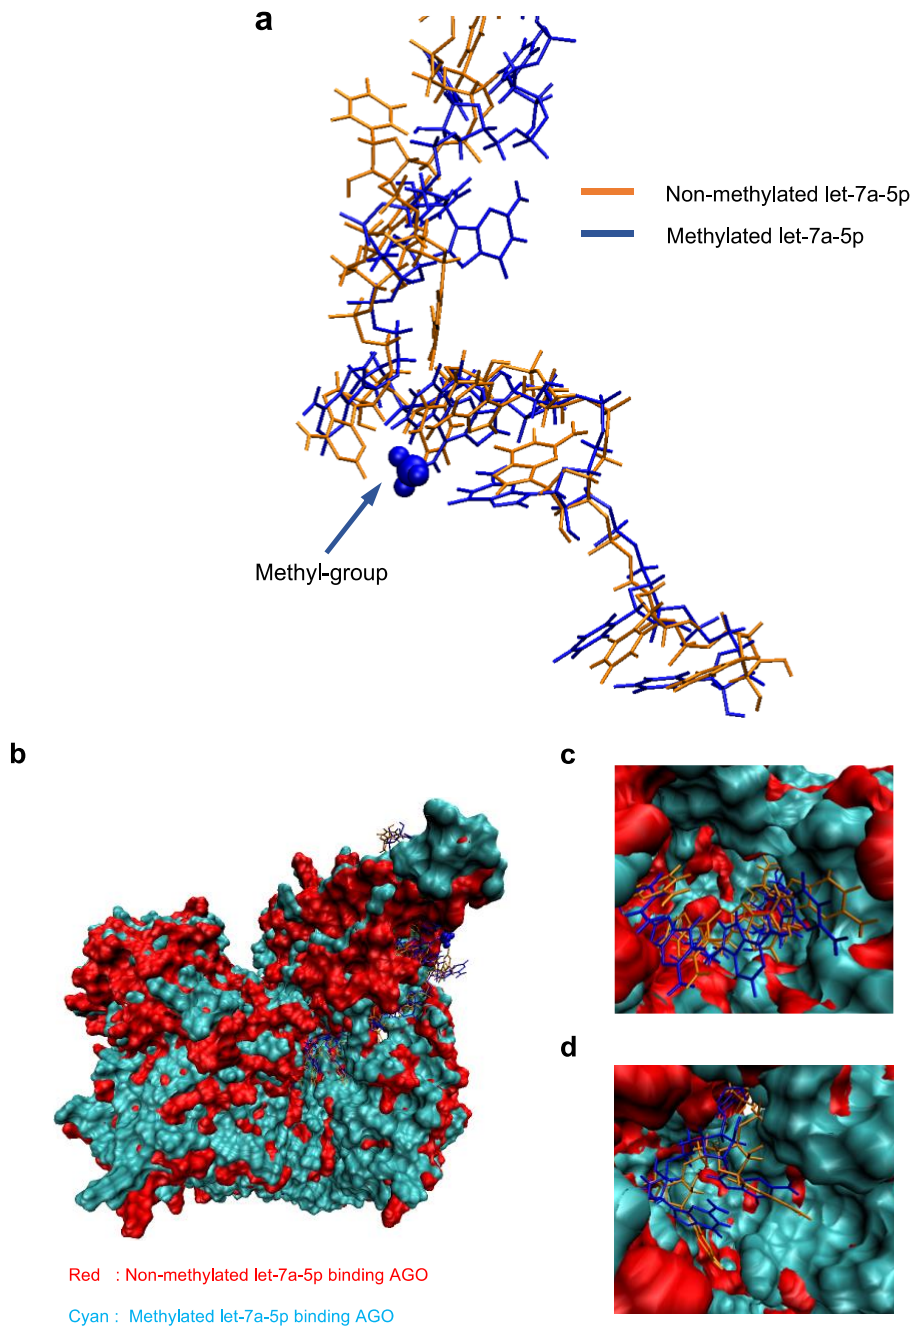

**Supplementary Figure 16.** Prediction of let-7a-5p binding to AGO2 protein by a molecular mechanics approach. (a) Superposition of each miRNA is shown for stabilized conformations of each complex, as estimated by energy minimization. Orange and blue bonds represent means for let-7a-5p and for the methylated body, respectively. Although the conformations of the backbones were somewhat similar, the orientation of each base differed significantly between non-methylated and methylated forms. (b–d) m6A leads to a structural change in the whole complex (b) and a difference in the space size of the RNA recognition site (c, d).

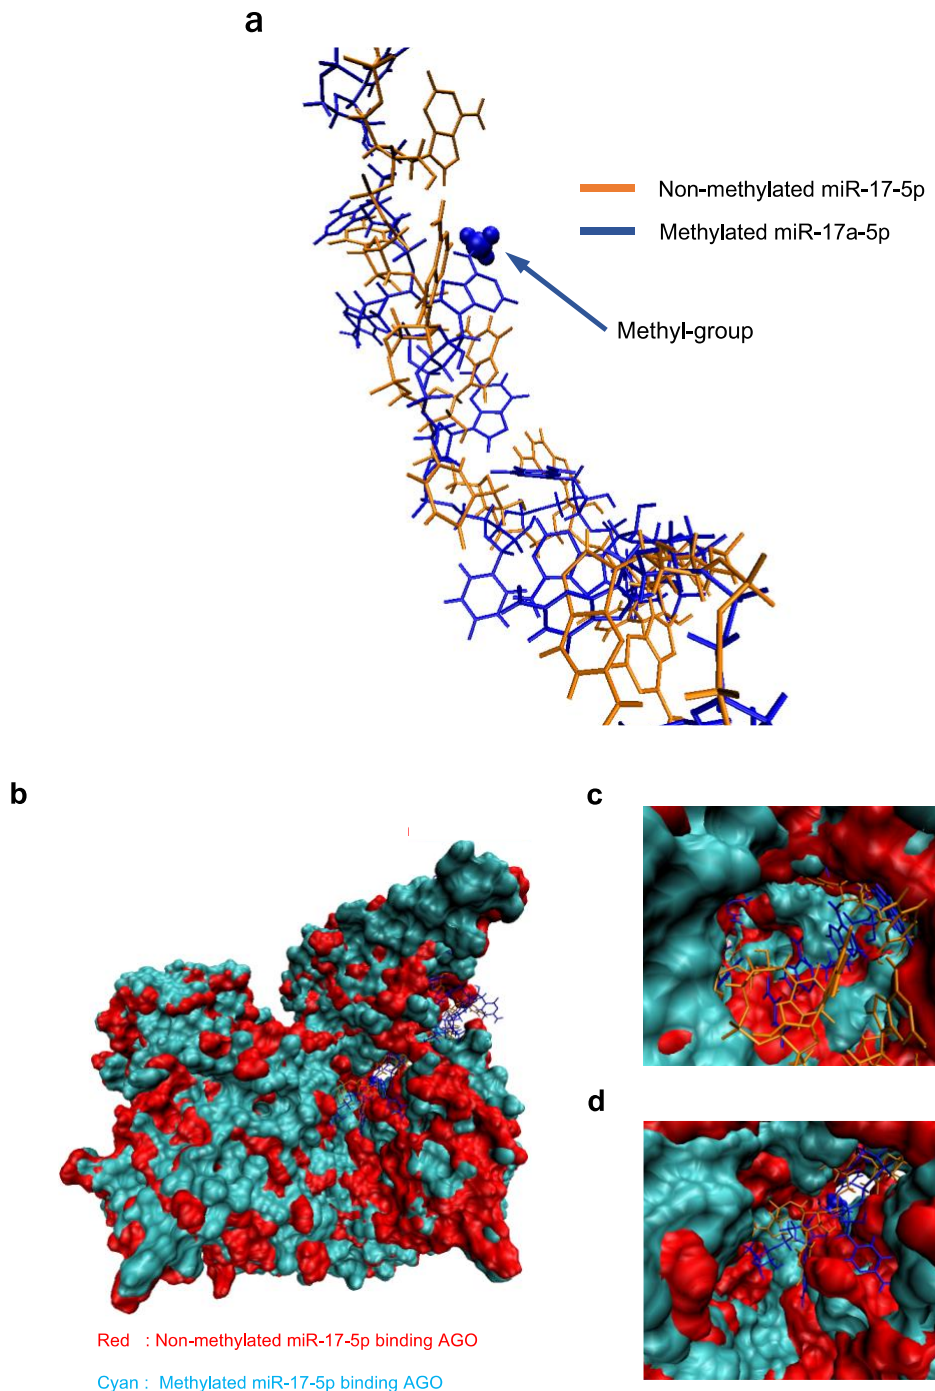

**Supplementary Figure 17.** Prediction of miR-17-5p binding to AGO2 protein by a molecular mechanics approach. (a) Superposition of each miRNA is shown for stabilized conformations of each complex, as estimated by energy minimization. Orange and blue bonds represent means for miR-17-5p and for the methylated body, respectively. The orientation of the backbone and each base differed significantly between non-methylated and methylated forms. (b–d) As is the case of miR-17-5p, m6A resulted in a structural change in the whole complex (b) as well as a difference in the space size of the RNA recognition site (c, d).

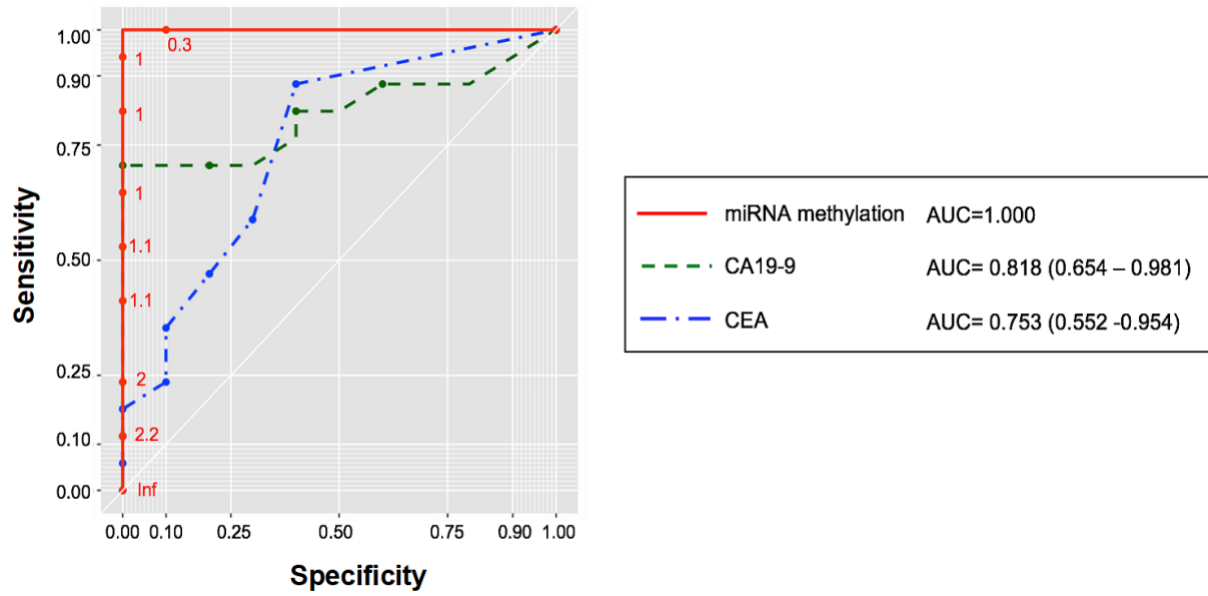

**Supplementary Figure 18.** Receiver operating characteristic (ROC) curves for miR-17-5p methylation level, CA19-9, and CEA. Numbers beside the curve indicate cut-off values. Area under the ROC curve (AUC) is shown with legends in the box to the right.

**Supplementary Table 1.** List of miRNAs investigated for methylated level by RNA sequencing following methylated RNA immunoprecipitation

| miR          | IP average |
|--------------|------------|
| hsa-let7a    | 2369110.75 |
| hsa-miR-21   | 270212.50  |
| hsa-miR-100  | 136722.00  |
| hsa-miR-222  | 125231.00  |
| hsa-miR-92a  | 98972.50   |
| hsa-miR-10a  | 87338.75   |
| hsa-miR-99b  | 83181.75   |
| hsa-miR-30d  | 78856.50   |
| hsa-miR-26a  | 67485.50   |
| hsa-miR-320a | 53015.50   |
| hsa-miR-148a | 28775.00   |
| hsa-miR-125a | 25089.75   |
| hsa-miR-423  | 24038.75   |
| hsa-miR-182  | 23166.50   |
| hsa-miR-7641 | 22926.75   |
| hsa-miR-378a | 17505.00   |
| hsa-miR-1307 | 16547.75   |
| hsa-miR-221  | 15846.75   |
| hsa-miR-183  | 14621.25   |
| hsa-miR-25   | 13353.00   |
| hsa-miR-24   | 12976.25   |
| hsa-miR-30a  | 11938.00   |
| hsa-miR-128  | 10923.25   |
| hsa-miR-941  | 10571.50   |
| hsa-miR-1246 | 9965.00    |
| hsa-miR-92b  | 8120.75    |
| hsa-miR-122  | 7972.50    |
| hsa-miR-5100 | 7827.50    |
| hsa-miR-106b | 7492.25    |
| hsa-miR-181a | 7321.75    |
| hsa-miR-27b  | 7140.75    |
| hsa-miR-29a  | 7051.25    |

| miR           | IP average |
|---------------|------------|
| hsa-miR-224   | 6763.50    |
| hsa-miR-191   | 6311.00    |
| hsa-miR-146b  | 5709.00    |
| hsa-miR-27a   | 5086.50    |
| hsa-miR-3182  | 5045.50    |
| hsa-miR-532   | 4561.00    |
| hsa-miR-3184  | 4464.75    |
| hsa-miR-30c   | 4148.75    |
| hsa-miR-181b  | 4136.75    |
| hsa-miR-744   | 3675.25    |
| hsa-miR-7706  | 3366.75    |
| hsa-miR-148b  | 3097.00    |
| hsa-miR-629   | 2873.00    |
| hsa-miR-103b  | 2707.50    |
| hsa-miR-103a  | 2664.50    |
| hsa-miR-98    | 2661.25    |
| hsa-miR-23a   | 2335.25    |
| hsa-miR-425   | 2225.50    |
| hsa-miR-192   | 2207.75    |
| hsa-miR-22    | 2177.50    |
| hsa-miR-3615  | 1955.75    |
| hsa-miR-5701  | 1907.75    |
| hsa-miR-155   | 1817.00    |
| hsa-miR-149   | 1250.00    |
| hsa-miR-7704  | 1156.00    |
| hsa-miR-1180  | 1089.50    |
| hsa-miR-1275  | 965.00     |
| hsa-miR-769   | 955.25     |
| hsa-miR-1273g | 920.75     |
| hsa-miR-484   | 914.75     |
| hsa-miR-17    | 875.50     |

The miRNAs we analyzed in the present study are highlighted in yellow.

**Supplementary Table 2.** Dynamic range of detection of methylated miRNAs

| <b>Spiked in (%)</b> | <b>Detected(%)</b> | <b>S.D.</b> |
|----------------------|--------------------|-------------|
| 0.1000               | 0.0937             | 0.0013      |
| 1.0000               | 0.9881             | 0.0188      |
| 5.0000               | 4.8934             | 0.0944      |
| 10.0000              | 9.7870             | 0.3184      |

S.D., standerd deviation

**Supplementary Table 3.** Clinicopathological characteristics of colorectal cancer patients

| Sample number | Location | Tumor depth | Lymph node metastasis | Distant metastasis | Pathological stage* |
|---------------|----------|-------------|-----------------------|--------------------|---------------------|
| No.1          | Rectum   | T2          | N0                    | -                  | I                   |
| No.2          | Rectum   | T2          | N0                    | -                  | I                   |
| No.3          | Colon    | T2          | N0                    | -                  | I                   |
| No.4          | Rectum   | T2          | N0                    | -                  | I                   |
| No.5          | Colon    | T1          | N0                    | -                  | I                   |
| No.6          | Colon    | T2          | N0                    | -                  | I                   |
| No.7          | Rectum   | T3          | N3                    | Liver metastasis   | IV                  |
| No.8          | Colon    | T3          | N2                    | Liver metastasis   | IV                  |
| No.9          | Rectum   | T3          | N1                    | Liver metastasis   | IV                  |
| No.10         | Rectum   | T3          | NA                    | Liver metastasis   | IV                  |
| No.11         | Colon    | T4a         | NA                    | Liver metastasis   | IV                  |
| No.12         | Rectum   | NA          | NA                    | Liver metastasis   | IV                  |

\*Tumor-node-metastasis (TNM) classification was according to the 7th edition of TNM staging of the Union for International Cancer Control

([https://www.nccn.org/professionals/physician\\_gls/f\\_guidelines.asp](https://www.nccn.org/professionals/physician_gls/f_guidelines.asp)).

NA, not available.

**Supplementary Table 4.** Clinicopathological characteristics of gastric cancer patients

| Sample number | Histology                  | Tumor depth | Lymph node metastasis | Distant metastasis | Pathological stage* |
|---------------|----------------------------|-------------|-----------------------|--------------------|---------------------|
| No.1          | Tubular adenocarcinoma     | T3          | N1                    | 0                  | II B                |
| No.2          | Tubular adenocarcinoma     | T3          | N2                    | 0                  | III A               |
| No.3          | Tubular adenocarcinoma     | T3          | N3a                   | 0                  | III B               |
| No.4          | Signet-ring cell carcinoma | T4a         | N3a                   | 0                  | III C               |
| No.5          | Tubular adenocarcinoma     | T4a         | N3b                   | 0                  | III C               |
| No.6          | Endocrine carcinoma        | T4a         | N1                    | 0                  | III A               |

\*Tumor-node-metastasis (TNM) classification was according to the 7th edition of TNM staging of the Union for International Cancer Control

([https://www.nccn.org/professionals/physician\\_gls/f\\_guidelines.asp](https://www.nccn.org/professionals/physician_gls/f_guidelines.asp)).

**Supplementary Table 5.** Clinicopathological characteristics of pancreatic cancer patients

| Sample No. | Clinical stage before surgery | T   | N | M | Pathological stage* |
|------------|-------------------------------|-----|---|---|---------------------|
| No. 1      | I A                           | Tis | 0 | 0 | 0                   |
| No. 2      | I A                           | 1   | 0 | 0 | I A                 |
| No. 3      | II A                          | 1   | 0 | 0 | I A                 |
| No. 4      | II A                          | 1   | 0 | 0 | I A                 |
| No. 5      | II A                          | 1   | 0 | 0 | I A                 |
| No. 6      | II A                          | 3   | 0 | 0 | II A                |
| No. 7      | II A                          | 3   | 0 | 0 | II A                |
| No. 8      | II A                          | 3   | 0 | 0 | II A                |
| No. 9      | II A                          | 3   | 0 | 0 | II A                |
| No. 10     | II A                          | 3   | 0 | 0 | II A                |
| No. 11     | II A                          | 3   | 1 | 0 | II B                |
| No. 12     | II A                          | 3   | 1 | 0 | II B                |
| No. 13     | I A                           | 3   | 1 | 0 | II B                |
| No. 14     | II A                          | 3   | 1 | 0 | II B                |
| No. 15     | II B                          | 3   | 1 | 0 | II B                |
| No. 16     | II A                          | 2   | 1 | 0 | II B                |
| No. 17     | I A                           | 3   | 1 | 0 | II B                |

\* Tumor-node-metastasis (TNM) classification was according to the 7th edition of TNM staging of the Union for International Cancer Control

([https://www.nccn.org/professionals/physician\\_gls/f\\_guidelines.asp](https://www.nccn.org/professionals/physician_gls/f_guidelines.asp)). T, N, and M scores are those of pathological diagnosis.

Tis, carcinoma in situ.
